# Supplementary material
Source: publisher site journal article supplement (https://www.kjim.org/upload/media/kjim-2021-475-suppl8.pdf)
Supplement: Supplementary file 1 [file kjim-2021-475-suppl8.pdf]

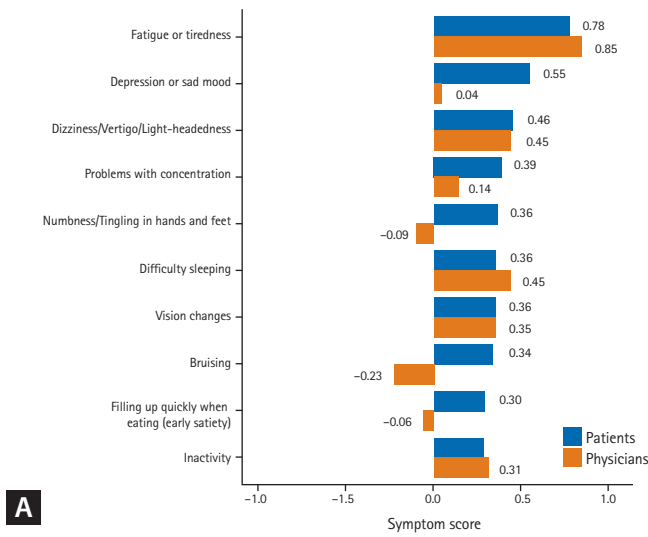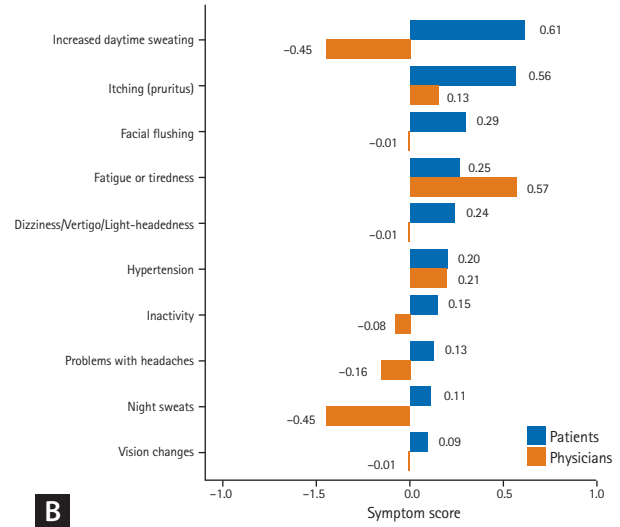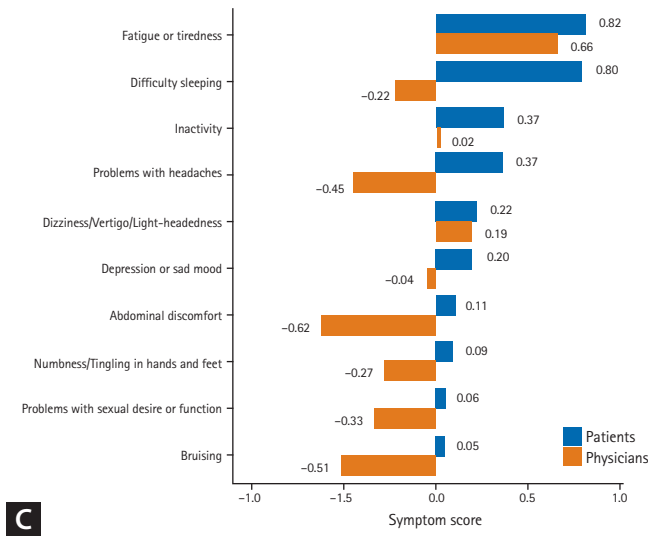

**Supplementary Figure 3.** Most severe symptoms reported by patients and physicians (A) myelofibrosis (MF), (B) polycythemia vera (PV), (C) essential thrombocythemia (ET). The symptom severity was rated on scale that ranged from 0 to 10 in patients and from 0 to 5 in physicians. The score was standardized to be mean 0 and standard deviation 1. For patients, standardized mean for the top 10 symptoms score was presented, and for physician, standardized score for the top 10 symptoms of patients was presented.
